# Supplementary material for: Influence of supramolecular encapsulation of camptothecin by cucurbit[7]uril: reduced toxicity and preserved anti-cancer activity
Source: Royal Society of Chemistry journal article supplement (doi:10.1039/c6md00239k), 2016-01-01
Supplement: c6md00239k1.pdf [file c6md00239k1.pdf]

# **Influence of Supramolecular Encapsulation of Camptothecin by Cucurbit[7]uril: Reduced Toxicity and Preserved Anti-Cancer Activity**

Xue Yang,<sup>a</sup> Ziyi Wang,<sup>a,b</sup> Yanan Niu,<sup>a</sup> Xiuping Chen,<sup>a</sup> Simon M. Y. Lee,<sup>a</sup> and Ruibing Wang<sup>a,\*</sup>

<sup>a</sup> State Key Laboratory of Quality Research in Chinese Medicine, Institute of Chinese Medical Sciences, University of Macau, Avenida da Universidade, Taipa, Macau, China. <sup>b</sup> Undergraduate Research Program, China Pharmaceutical University, Nanjing, China.

\* Correspondence should be addressed to Dr. Ruibing Wang at [rwang@umac.mo](mailto:rwang@umac.mo)

## **Supporting Information**

### **Table of Contents**

|                                                                                                           |    |
|-----------------------------------------------------------------------------------------------------------|----|
| Morphology of representative zebrafish larvae (3 dpf) after exposure to CPT and CPT@CB[7] for 2 days..... | S1 |
| Lateral view of Tg( <i>fli-1</i> :EGFP) zebrafish embryos at 3 dpf treated with CPT and CPT@CB[7].....    | S2 |
| The survival rate of zebrafish embryos after treatment with CPT and CPT@CB[7] for 2 days.....             | S3 |

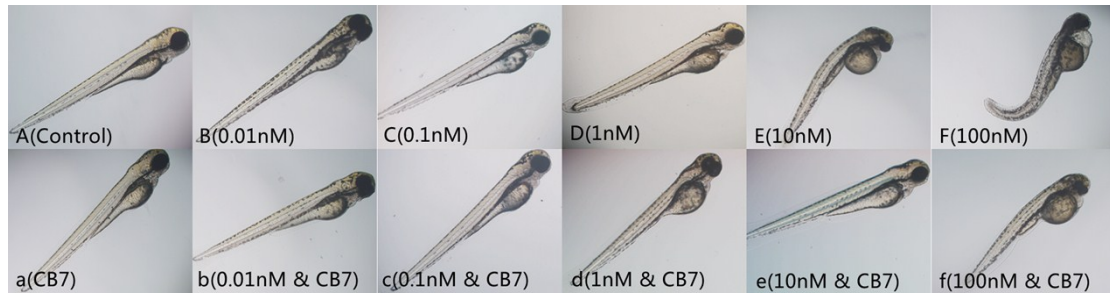

**Fig.S1** Morphology of representative zebrafish larvae (3 dpf) after exposure to various concentrations of CPT (0.01 to 100 nM) in the absence and in the presence of CB[7] (100  $\mu$ M) for 2 days.

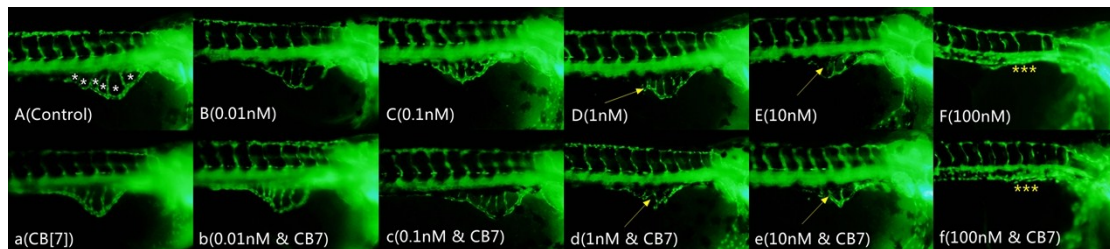

**Fig.S2** Lateral view of Tg(*fli-1*:EGFP) zebrafish embryos at 3 dpf treated with CPT (0.01 to 100 nM) in the absence and in the presence of CB[7] (100  $\mu$ M). Yellow arrows point to regions where SIVs were inhibited to some degree, and yellow asterisks point to regions where SIVs were completely inhibited.

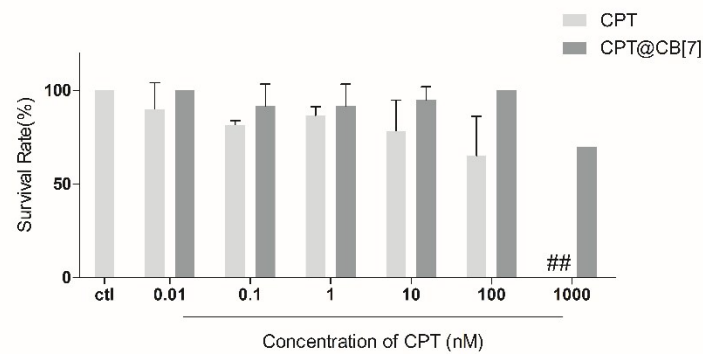

**Fig.S3** The survival rate of zebrafish embryos after treatment with CPT or CPT@CB[7] for 2 days. ## means group of 1000 nM CPT all died. Data are presented as mean  $\pm$  S.E.M. (n=12-16) of three independent experiments.
